# Supplementary material for: Lyophilized cell-free supernatants of Lactobacillus isolates exhibited antibiofilm, antioxidant, and reduces nitric oxide activity in lipopolysaccharide-stimulated RAW 264.7 cells
Source: PubMed Central journal article supplement (PMC8641486; doi:10.7717/peerj.12586), 2021-11-30

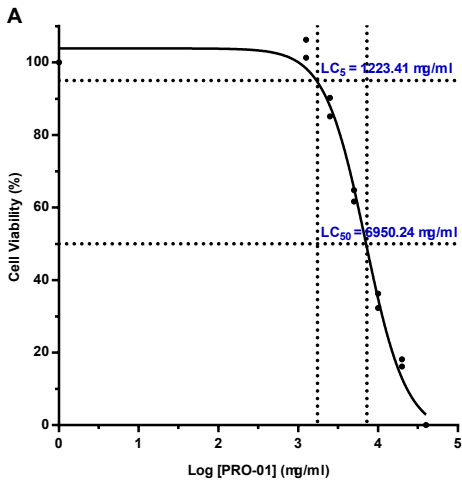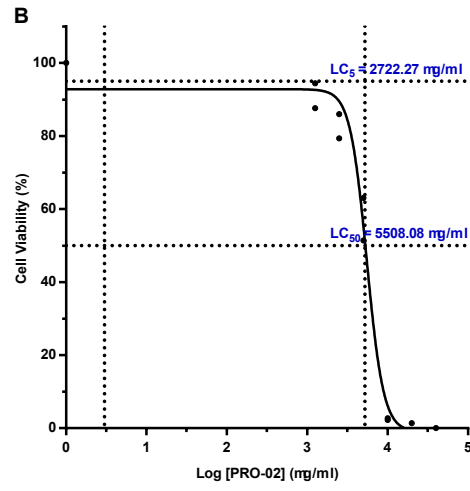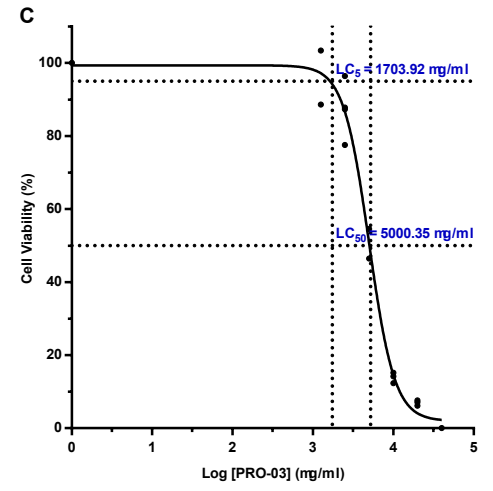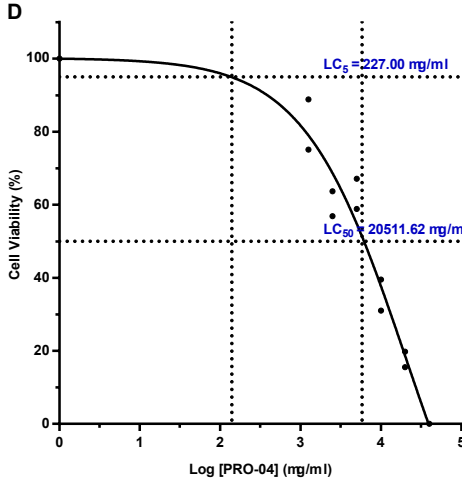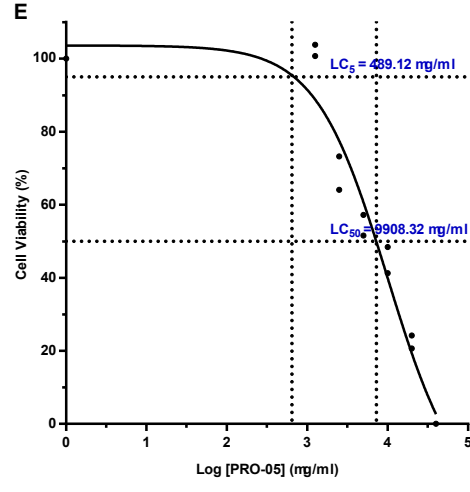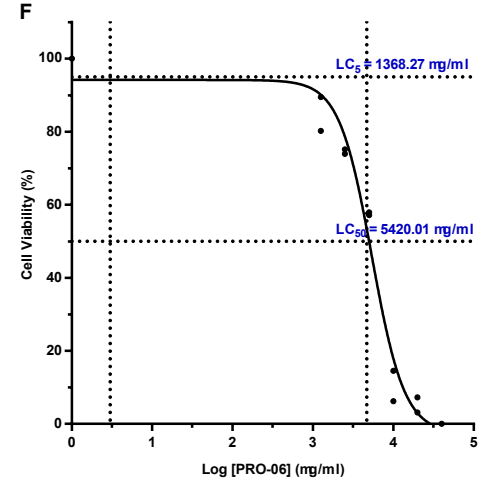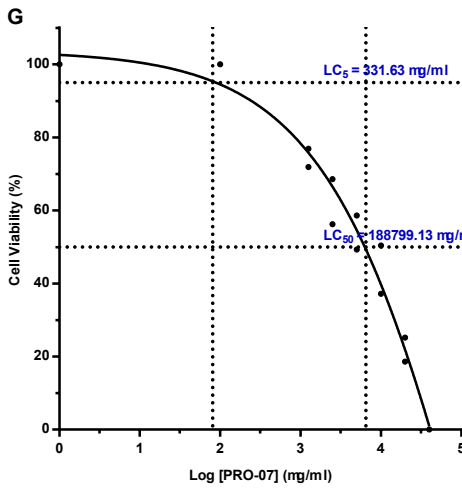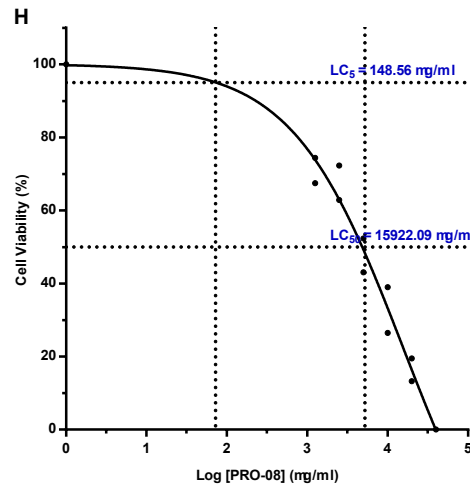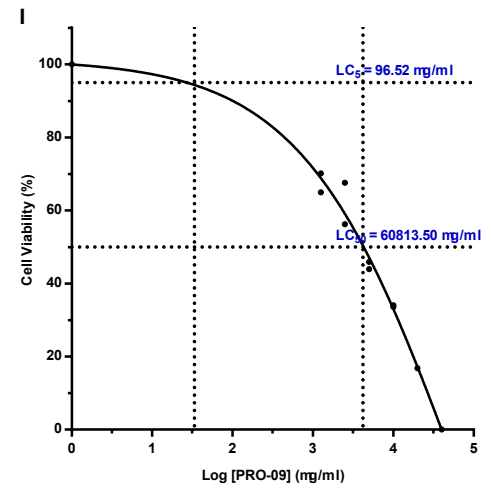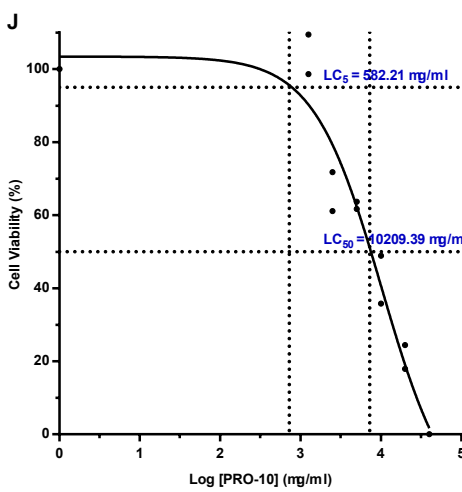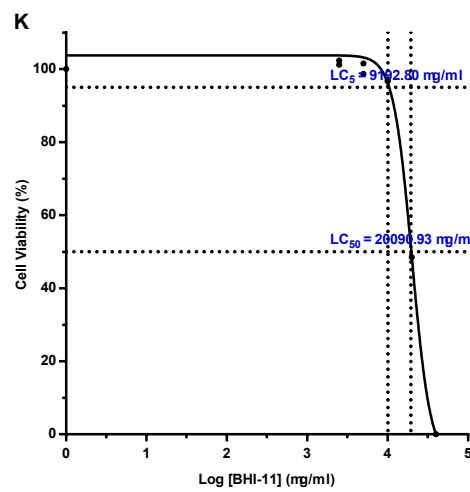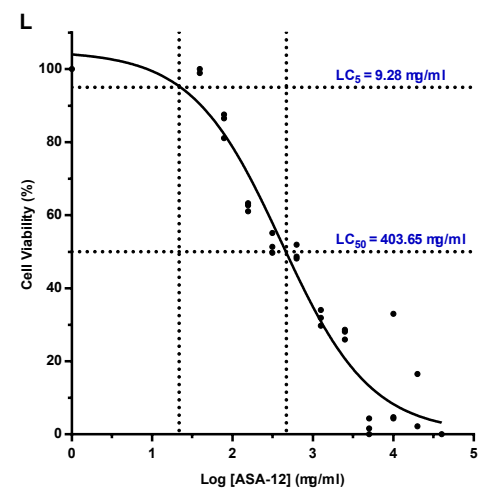

Supplement: peerj-09-12586-s001.pdf [file peerj-09-12586-s001.pdf]
