# Supplementary material for: Lyophilized cell-free supernatants of Lactobacillus isolates exhibited antibiofilm, antioxidant, and reduces nitric oxide activity in lipopolysaccharide-stimulated RAW 264.7 cells
Source: PeerJ journal article supplement (doi:10.7717/peerj.12586), 2021-11-30
Supplement: Raw_data_PeerJ.zip [file Raw_data_PeerJ.zip]

## Sheet: MIC MBC
	S. aureus		MRSA		E. coli		A.baumannii
	MIC	MBC	MIC	MBC	MIC	MBC	MIC	MBC
T0601	50	>100	50	>100	25	>100	25	>100
T0602	25	>100	25	>100	25	>100	25	100
T0603	25	>100	25	>100	25	>100	25	>100
T0701	25	>100	50	>100	50	>100	25	>100
T0802	25	>100	25	>100	50	>100	50	>100
T0901	25	>100	25	>100	25	>100	25	>100
T0902	ND	ND	ND	ND	25	>100	25	>100
T1301	ND	ND	ND	ND	25	>100	25	>100
T1304	ND	ND	ND	ND	25	>100	25	>100
T1901	25	>100	25	>100	50	>100	25	>100
	MRSA		E. coli		A.baumannii
	MIC	MBC	MIC	MBC	MIC	MBC
T0601	50	>100	25	>100	25	>100
T0602	25	>100	25	>100	25	100
T0603	25	>100	25	>100	25	>100
T0701	50	>100	50	>100	25	>100
T0802	25	>100	50	>100	50	>100
T0901	25	>100	25	>100	25	>100
T0902	ND	ND	25	>100	25	>100
T1301	ND	ND	25	>100	25	>100
T1304	ND	ND	25	>100	25	>100
T1901	25	>100	50	>100	25	>100

## Sheet: E. coli
MBIC
Control	0.133																							Mean
	T0601		T0602		T0603		T0701		T0802		T0901		T0902		T1301		T1304		T1901						T0601	T0602	T0603	T0701	T0802	T0901	T0902	T1301	T1304	T1901
N=1	0.076	42.8571	0.086	35.3383	0.089	33.0827	0.082	38.3459	0.073	45.1128	0.089	33.0827	0.094	29.3233	0.095	28.5714	0.1	24.812	0.102	23.3083				1x MIC	31.8296	33.584	33.8346	18.797	19.5489	30.0752	30.5764	22.5564	14.5363	26.817
N=2	0.075	43.609	0.087	34.5865	0.087	34.5865	0.089	33.0827	0.077	42.1053	0.092	30.8271	0.098	26.3158	0.093	30.0752	0.087	34.5865	0.098	26.3158		2MIC		2x MIC	43.8596	34.0852	32.0802	34.0852	41.3534	30.0752	28.0702	30.3258	31.0777	25.3133
N=3	0.073	45.1128	0.09	32.3308	0.095	28.5714	0.092	30.8271	0.084	36.8421	0.098	26.3158	0.095	28.5714	0.09	32.3308	0.088	33.8346	0.098	26.3158
Mean		43.8596	0.0876667	34.0852	0.0903333	32.0802	0.0876667	34.0852	0.078	41.3534	0.093	30.0752	0.0956667	28.0702	0.0926667	30.3258	0.0916667	31.0777	0.0993333	25.3133				SD
SD		1.14852	0.00208167	1.56516	0.00416333	3.13032	0.0051316	3.85835	0.00556776	4.18629	0.00458258	3.44555	0.00208167	1.56516	0.00251661	1.89219	0.00723418	5.43923	0.0023094	1.73639					T0601	T0602	T0603	T0701	T0802	T0901	T0902	T1301	T1304	T1901
																								1x MIC	9.18812	3.03869	3.27737	5.42188	5.96786	1.30229	1.73639	3.90688	3.78438	0.434098
N=1	0.08	39.8496	0.084	36.8421	0.083	37.594	0.1	24.812	0.095	28.5714	0.09	32.3308	0.095	28.5714	0.106	20.3008	0.119	10.5263	0.098	26.3158				2x MIC	1.14852	1.56516	3.13032	3.85835	4.18629	3.44555	1.56516	1.89219	5.43923	1.73639
N=2	0.088	33.8346	0.089	33.0827	0.09	32.3308	0.11	17.2932	0.092	30.8271	0.093	30.0752	0.091	31.5789	0.097	27.0677	0.109	18.0451	0.097	27.0677		1MIC
N=3	0.104	21.8045	0.092	30.8271	0.091	31.5789	0.114	14.2857	0.107	19.5489	0.093	30.0752	0.091	31.5789	0.106	20.3008	0.113	15.0376	0.097	27.0677
Mean		31.8296	0.0883333	33.584	0.088	33.8346	0.108	18.797	0.098	26.3158	0.092	30.8271	0.0923333	30.5764	0.103	22.5564	0.113667	14.5363	0.0973333	26.817
SD		9.18812	0.00404145	3.03869	0.0043589	3.27737	0.0072111	5.42188	0.00793725	5.96786	0.00173205	1.30229	0.0023094	1.73639	0.00519615	3.90688	0.00503322	3.78438	0.00057735	0.434098
		0.181369	0.666667	0.666667	0.482545	0.482545	0.00347548	0.00347548	0.0154669	0.0154669	0.666667	0.666667	0.289331	0.289331	0.0971725	0.0971725	0.00614131	0.00614131	0.183503	0.183503
MBEC
Control	1.073
	T0601		T0602		T0603		T0701		T0802		T0901		T0902		T1301		T1304		T1901					Mean
N=1	0.263	75.5803	0.197	81.7084	0.253	76.5088	0.178	83.4726	0.371	65.5525	0.218	79.7586	0.314	70.8449	0.31	71.2163	0.218	79.7586	0.159	85.2368					T0601	T0602	T0603	T0701	T0802	T0901	T0902	T1301	T1304	T1901
N=2	0.341	68.338	0.177	83.5655	0.195	81.8942	0.178	83.4726	0.298	72.3305	0.227	78.9229	0.24	77.7159	0.23	78.6444	0.226	79.0158	0.167	84.494		2MIC		1x MIC	68.2761	71.402	70.4735	71.2782	59.61	64.2835	79.5729	75.147	63.6645	58.8672
N=3	0.341	68.338	0.246	77.1588	0.145	86.5367	0.278	74.1876	0.211	80.4085	0.235	78.1801	0.151	85.9796	0.25	76.7874	0.26	75.8589	0.18	83.2869				2x MIC	70.7521	80.8109	81.6465	80.3776	72.7639	78.9539	78.1801	75.5494	78.2111	84.3392
Mean	0.315	70.7521	0.206667	80.8109	0.197667	81.6465	0.211333	80.3776	0.293333	72.7639	0.226667	78.9539	0.235	78.1801	0.263333	75.5494	0.234667	78.2111	0.168667	84.3392
SD	0.0450333	4.18137	0.0355012	3.2963	0.0540494	5.01851	0.057735	5.36073	0.080102	7.43751	0.0085049	0.789684	0.0816149	7.57799	0.0416333	3.86568	0.022301	2.07066	0.0105987	0.984099				SD
																									T0601	T0602	T0603	T0701	T0802	T0901	T0902	T1301	T1304	T1901
N=1	0.268	75.1161	0.425	60.5385	0.458	57.4745	0.335	68.8951	0.344	68.0594	0.335	68.8951	0.3	72.1448	0.314	70.8449	0.414	61.5599	0.405	62.3955				1x MIC	6.56574	9.50392	11.7975	3.2832	7.69091	8.3112	6.60219	3.85115	3.97128	7.18197
N=2	0.409	62.0241	0.235	78.1801	0.286	73.4448	0.324	69.9164	0.455	57.753	0.331	69.2665	0.196	81.8013	0.234	78.273	0.418	61.1885	0.392	63.6026		1MIC		2x MIC	4.18137	3.2963	5.01851	5.36073	7.43751	0.789684	7.57799	3.86568	2.07066	0.984099
N=3	0.348	67.688	0.264	75.4875	0.21	80.5014	0.269	75.0232	0.506	53.0176	0.488	54.689	0.164	84.7725	0.255	76.3231	0.342	68.2451	0.532	50.6035
Mean	0.341667	68.2761	0.308	71.402	0.318	70.4735	0.309333	71.2782	0.435	59.61	0.384667	64.2835	0.22	79.5729	0.267667	75.147	0.391333	63.6645	0.443	58.8672
SD	0.070713	6.56574	0.102357	9.50392	0.127059	11.7975	0.0353601	3.2832	0.0828312	7.69091	0.0895116	8.3112	0.0711056	6.60219	0.0414769	3.85115	0.0427707	3.97128	0.0773499	7.18197
		0.326135	0.256134	0.256134	0.107466	0.107466	0.208974	0.208974	0.268121	0.268121	0.0801612	0.0801612	0.458381	0.458381	0.00586515	0.00586515	0.0524117	0.0524117	0.0199151	0.0199151
																0.00586515
% Biofilm inhibition = {( OD570 without probiotic- OD570 with probiotic) / OD570 without probiotic} x 100
% Biofilm eradication = {( OD570 without probiotic- OD570 with probiotic) / OD570 without probiotic} x 100

## Sheet: A.baumannii
MBIC
Control	0.1																							Mean
	T0601		T0602		T0603		T0701		T0802		T0901		T0902		T1301		T1304		T1901						T0601	T0602	T0603	T0701	T0802	T0901	T0902	T1301	T1304	T1901
N=1	0.08	20	0.079	21	0.09	10	0.085	15	0.072	28	0.084	16	0.106	-6	0.098	2	0.079	21	0.074	26				1x MIC	15.3333	14	10	11.6667	23	14	5.66667	7	25.3333	21.3333
N=2	0.073	27	0.082	18	0.099	1	0.09	10	0.07	30	0.088	12	0.097	3	0.1	0	0.072	28	0.075	25		2MIC		2x MIC	23.3333	18.6667	3.66667	13.3333	29.3333	14	2	1	26.3333	26.3333
N=3	0.077	23	0.083	17	0.1	0	0.085	15	0.07	30	0.086	14	0.091	9	0.099	1	0.07	30	0.072	28
Mean	0.0766667	23.3333	0.0813333	18.6667	0.0963333	3.66667	0.0866667	13.3333	0.0706667	29.3333	0.086	14	0.098	2	0.099	1	0.0736667	26.3333	0.0736667	26.3333				SD
SD	0.00351188	3.51188	0.00208167	2.08167	0.00550757	5.50757	0.00288675	2.88675	0.0011547	1.1547	0.002	2	0.00754983	7.54983	0.001	1	0.00472582	4.72582	0.00152753	1.52753					T0601	T0602	T0603	T0701	T0802	T0901	T0902	T1301	T1304	T1901
																								1x MIC	7.63763	5.2915	7	3.78594	1	4.16333	5.68624	2.64575	4.6188	7.23418
N=1	0.093	7	0.09	10	0.083	17	0.091	9	0.079	21	0.084	16	0.099	1	0.095	5	0.072	28	0.087	13				2x MIC	3.51188	2.08167	5.50757	2.88675	1.1547	2	7.54983	1	4.72582	1.52753
N=2	0.078	22	0.088	12	0.09	10	0.084	16	0.078	22	0.092	8	0.096	4	0.09	10	0.072	28	0.075	25		1MIC
N=3	0.083	17	0.08	20	0.097	3	0.09	10	0.077	23	0.086	14	0.088	12	0.094	6	0.08	20	0.074	26
Mean	0.0846667	15.3333	0.086	14	0.09	10	0.0883333	11.6667	0.078	22	0.0873333	12.6667	0.0943333	5.66667	0.093	7	0.0746667	25.3333	0.0786667	21.3333
SD	0.00763763	7.63763	0.0052915	5.2915	0.007	7	0.00378594	3.78594	0.001	1	0.00416333	4.16333	0.00568624	5.68624	0.00264575	2.64575	0.0046188	4.6188	0.00723418	7.23418
		0.0863356	0.372645	0.372645	0.069566	0.069566	0.706895	0.706895	0.00205973	0.00205973	0.42265	0.42265	0.173189	0.173189	0.102242	0.102242	0.858105	0.858105	0.341573	0.341573
MBEC
Control	0.253
	T0601		T0602		T0603		T0701		T0802		T0901		T0902		T1301		T1304		T1901					Mean
N=1	0.174	31.2253	0.176	30.4348	0.161	36.3636	0.211	16.6008	0.161	36.3636	0.167	33.9921	0.192	24.1107	0.161	36.3636	0.124	50.9881	0.104	58.8933					T0601	T0602	T0603	T0701	T0802	T0901	T0902	T1301	T1304	T1901
N=2	0.146	42.2925	0.153	39.5257	0.161	36.3636	0.16	36.7589	0.125	50.5929	0.174	31.2253	0.182	28.0632	0.162	35.9684	0.119	52.9644	0.089	64.8221		2MIC		1x MIC	40.0527	38.6034	32.5428	41.6337	43.8735	44.2688	36.8906	47.4308	56.5217	54.9407
N=3	0.128	49.4071	0.151	40.3162	0.185	26.8775	0.163	35.5731	0.118	53.3597	0.135	46.6403	0.155	38.7352	0.163	35.5731	0.129	49.0119	0.088	65.2174				2x MIC	40.975	36.7589	33.2016	29.6443	46.7721	37.2859	30.303	35.9684	50.9881	62.9776
Mean	0.149333	40.975	0.16	36.7589	0.169	33.2016	0.178	29.6443	0.134667	46.7721	0.158667	37.2859	0.176333	30.303	0.162	35.9684	0.124	50.9881	0.0936667	62.9776
SD	0.0231805	9.16223	0.0138924	5.49108	0.0138564	5.47684	0.0286182	11.3115	0.0230723	9.11951	0.0207926	8.21843	0.0191398	7.56515	0.001	0.395257	0.005	1.97628	0.00896289	3.54264				SD
																									T0601	T0602	T0603	T0701	T0802	T0901	T0902	T1301	T1304	T1901
N=1	0.172	32.0158	0.162	35.9684	0.189	25.2964	0.158	37.5494	0.143	43.4783	0.162	35.9684	0.179	29.249	0.144	43.083	0.11	56.5217	0.153	39.5257				1x MIC	7.7286	2.28202	6.30349	4.61509	0.684605	8.3004	13.2357	4.01142	5.13834	13.675
N=2	0.133	47.4308	0.152	39.9209	0.163	35.5731	0.135	46.6403	0.143	43.4783	0.141	44.2688	0.179	29.249	0.131	48.2213	0.123	51.3834	0.087	65.6126		1MIC		2x MIC	9.16223	5.49108	5.47684	11.3115	9.11951	8.21843	7.56515	0.395257	1.97628	3.54264
N=3	0.15	40.7115	0.152	39.9209	0.16	36.7589	0.15	40.7115	0.14	44.664	0.12	52.5692	0.121	52.1739	0.124	50.9881	0.097	61.6601	0.102	59.6838
Mean	0.151667	40.0527	0.155333	38.6034	0.170667	32.5428	0.147667	41.6337	0.142	43.8735	0.141	44.2688	0.159667	36.8906	0.133	47.4308	0.11	56.5217	0.114	54.9407
SD	0.0195533	7.7286	0.0057735	2.28202	0.0159478	6.30349	0.0116762	4.61509	0.00173205	0.684605	0.021	8.3004	0.0334863	13.2357	0.0101489	4.01142	0.013	5.13834	0.0345977	13.675
		0.842328	0.425573	0.425573	0.923204	0.923204	0.124717	0.124717	0.622481	0.622481	0.163772	0.163772	0.209628	0.209628	0.0457979	0.0457979	0.31027	0.31027	0.309444	0.309444
