# Supplementary material for: Lyophilized cell-free supernatants of Lactobacillus isolates exhibited antibiofilm, antioxidant, and reduces nitric oxide activity in lipopolysaccharide-stimulated RAW 264.7 cells
Source: PeerJ. 2021 Nov 30;9:e12586. doi: 10.7717/peerj.12586 (PMC8641486; doi:10.7717/peerj.12586)
Supplement: Supplemental Information 3 [file peerj-09-12586-s003.docx]

**Table S2.** Activity of CFS on the eradication of established biofilm of *A. buamannii* and *E. coli* when compared with the control

| LAB | Percentage of the eradication (mean±SD) | | | | | |
| --- | --- | --- | --- | --- | --- | --- |
| *A. buamannii* | | | *E. coli* | | |
| 2 × MIC | 1 × MIC | Control | 2 × MIC | 1 × MIC | Control |
| T0601 | 40.97±9.16a | 40.05±7.73 a | 0.00±5.85 | 70.75±4.18 a | 68.28±6.57 a | 0.00±6.55 |
| T0602 | 36.76±5.49 a | 38.60±2.28 a | 0.00±5.85 | 80.81±3.30 a | 71.40±9.50 a | 0.00±6.55 |
| T0603 | 33.20±5.48 a | 32.54±6.30 a | 0.00±5.85 | 81.65±5.02 a | 70.47±11.80 a | 0.00±6.55 |
| T0701 | 29.64±11.31 a | 41.63±4.62 a | 0.00±5.85 | 80.38±5.36 a | 71.28±3.28 a | 0.00±6.55 |
| T0802 | 46.77±9.12 a | 43.87±0.68 a | 0.00±5.85 | 72.76±7.44 a | 59.61±7.69 a | 0.00±6.55 |
| T0901 | 37.29±8.22 a | 44.27±8.30 a | 0.00±5.85 | 78.95±0.79 a | 64.28±8.31 a | 0.00±6.55 |
| T0902 | 30.30±7.57 a | 36.89±13.24 a | 0.00±5.85 | 78.18±7.58 a | 79.57±6.60 a | 0.00±6.55 |
| T1301 | 35.97±0.40 a* | 47.43±4.01 a | 0.00±5.85 | 75.55±3.87 a* | 75.15±3.85 a | 0.00±6.55 |
| T1304 | 50.99±1.98 a | 56.52±5.14 a | 0.00±5.85 | 78.21±2.07 a* | 63.66±3.97 a | 0.00±6.55 |
| T1901 | 62.98±3.54 a | 54.94±13.67 a | 0.00±5.85 | 84.34±0.98 a* | 58.87±7.18 a | 0.00±6.55 |

a= Significant difference, compared with the negative control

*= Significant difference, compared with the 1 × MIC
